# Supplementary material for: Synthesis and Evaluation of Antimicrobial Activities of Novel N-Substituted Indole Derivatives
Source: Hindawi journal article supplement (doi:10.1155/2020/4358453), 2020-04-14
Supplement: f1 [file 4358453.f1.pdf]

## Supplementary Files 4358453

### Synthesis and evaluation of antimicrobial activities of Novel N-substituted indole derivatives

Tanveer M. Shaikh\* and Habtamu Debebe

Department of Chemistry, College of Natural and Computational Sciences

Mekelle University, Mekelle, Ethiopia

\*Corresponding author email: [tanveerchem1@gmail.com](mailto:tanveerchem1@gmail.com)

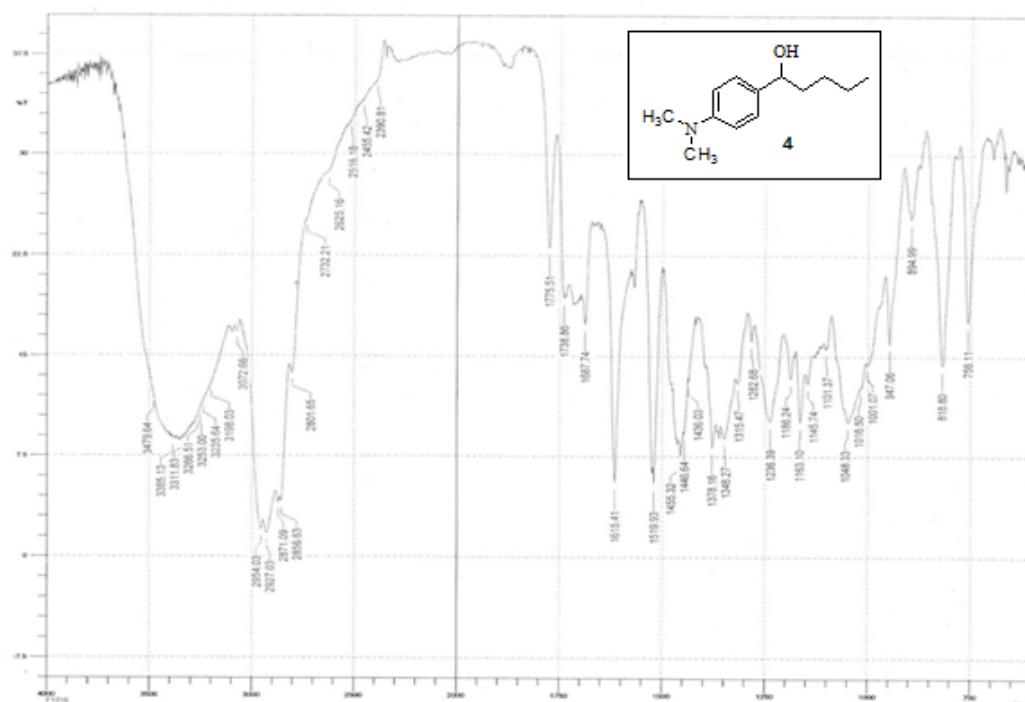

Comment:  
F1215

Date/Time: 4/12/2018 10:56:58 AM  
No. of Scans: 1  
Resolution: 2 [1/cm]  
Apodization: Happ-Genzel

FT-IR spectrum of 1-(4-(dimethylamino) phenyl) pentan-1-ol (4)

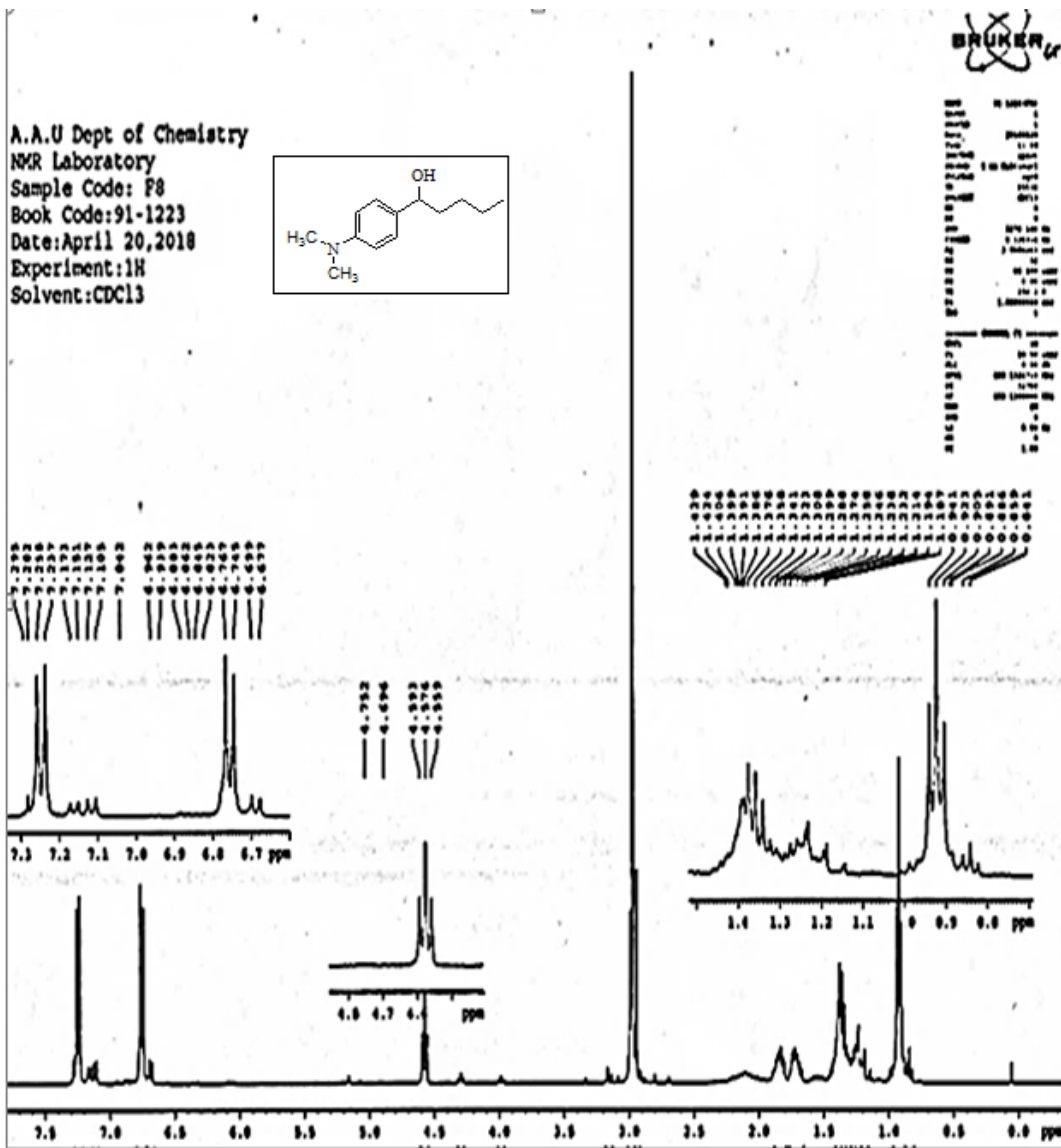

<sup>1</sup>H-NMR spectrum of 1-(4-(dimethylamino) phenyl) pentan-1-ol (4)

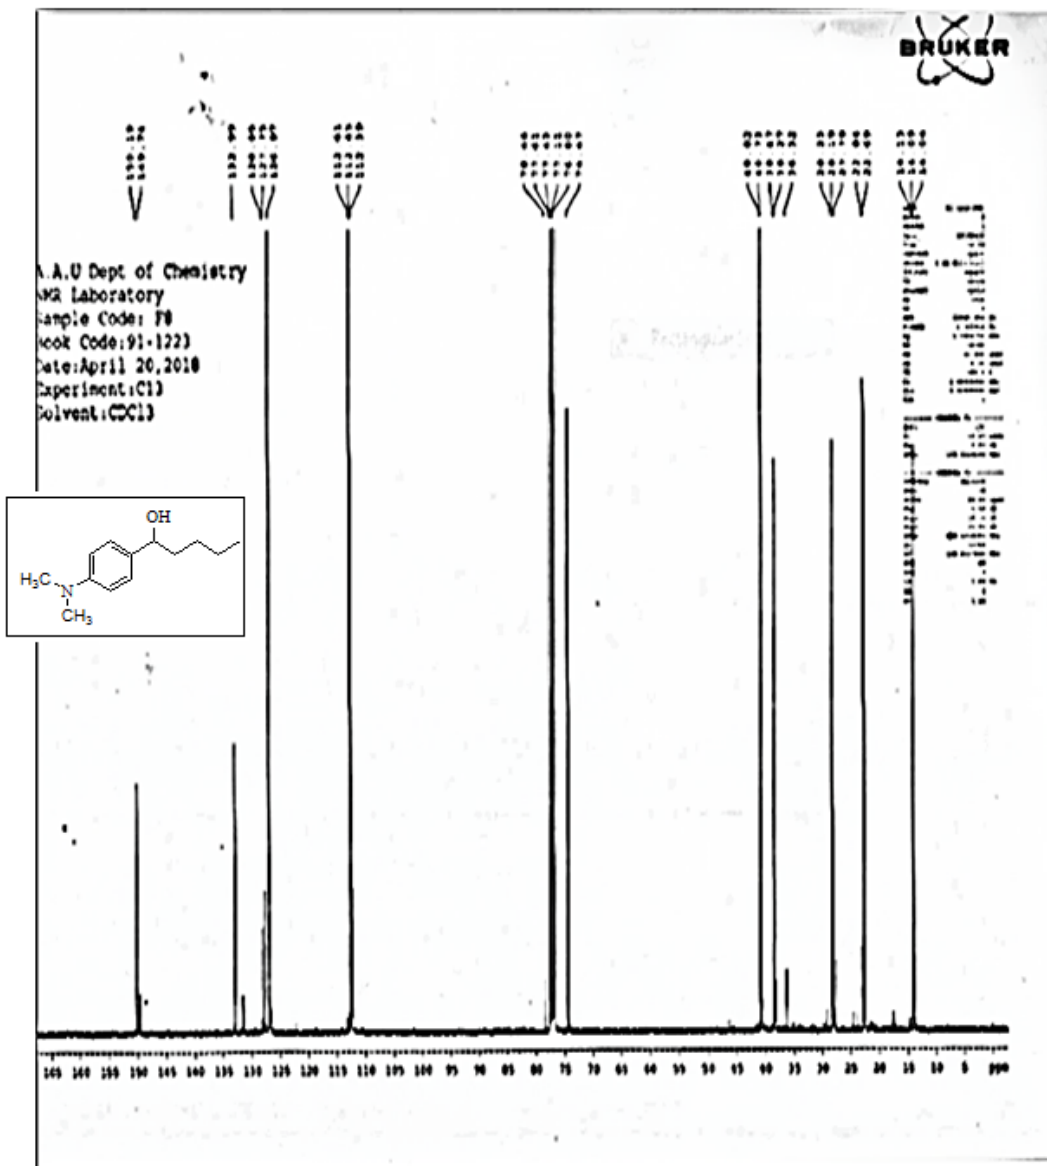

<sup>13</sup>C-NMR spectrum of 1-(4-(dimethylamino) phenyl) pentan-1-ol (4)

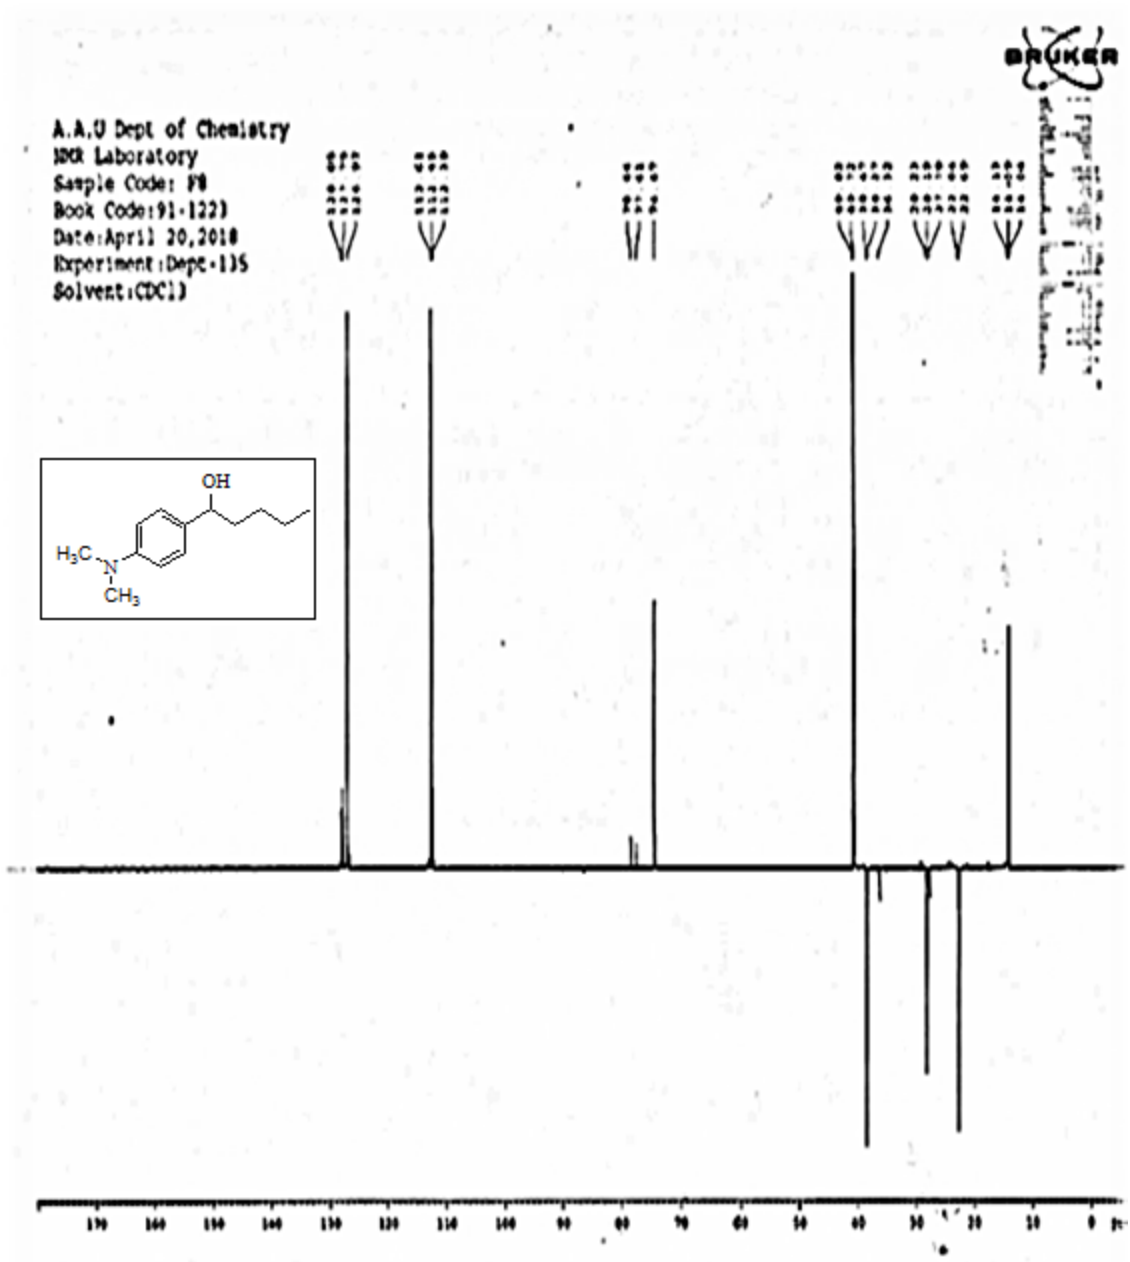

DEPT-135 spectrum of 1-(4-(dimethylamino) phenyl) pentan-1-ol (4)

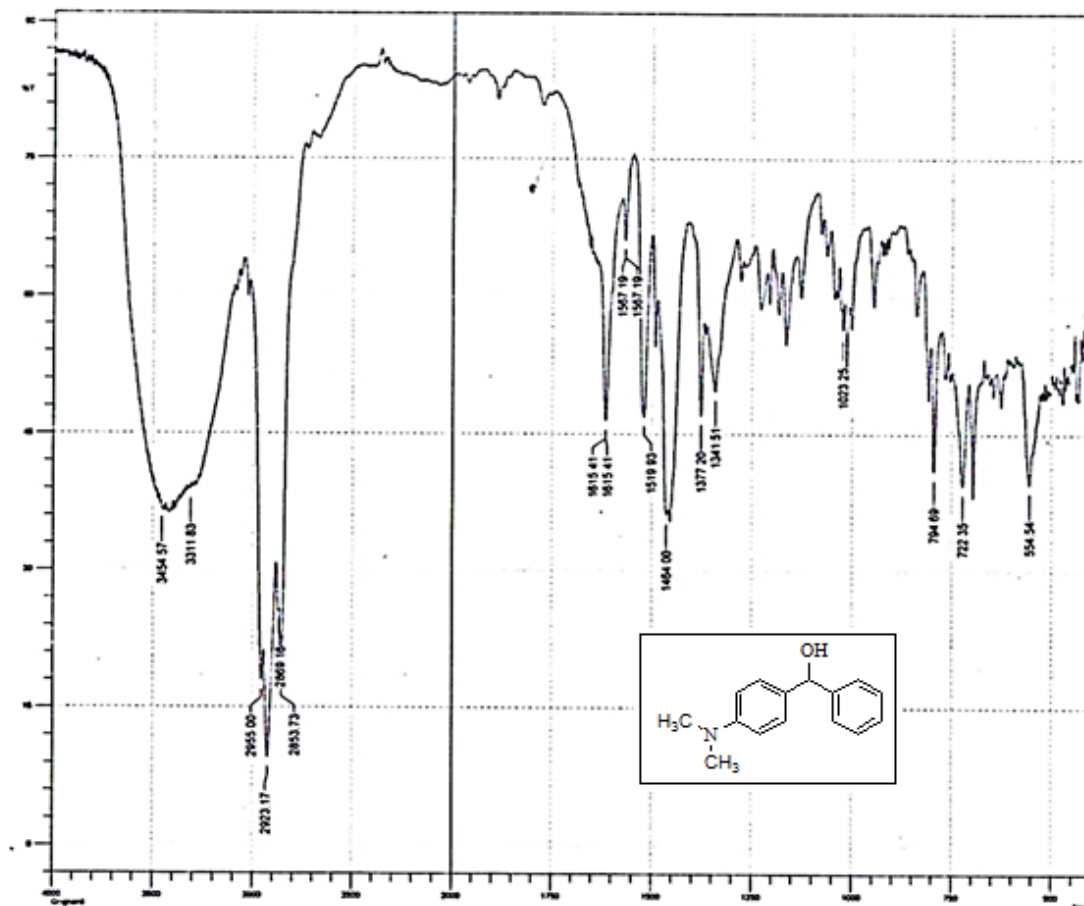

Comment;  
Grignard

Date/Time; 5/16/2018 10:08:54 AM  
No. of Scans; 3  
Resolution; 2 [1/cm]  
Apodization; Happ-Genzel

FT-IR spectrum of (4- (dimethyl amino) phenyl) (phenyl) methanol (6)

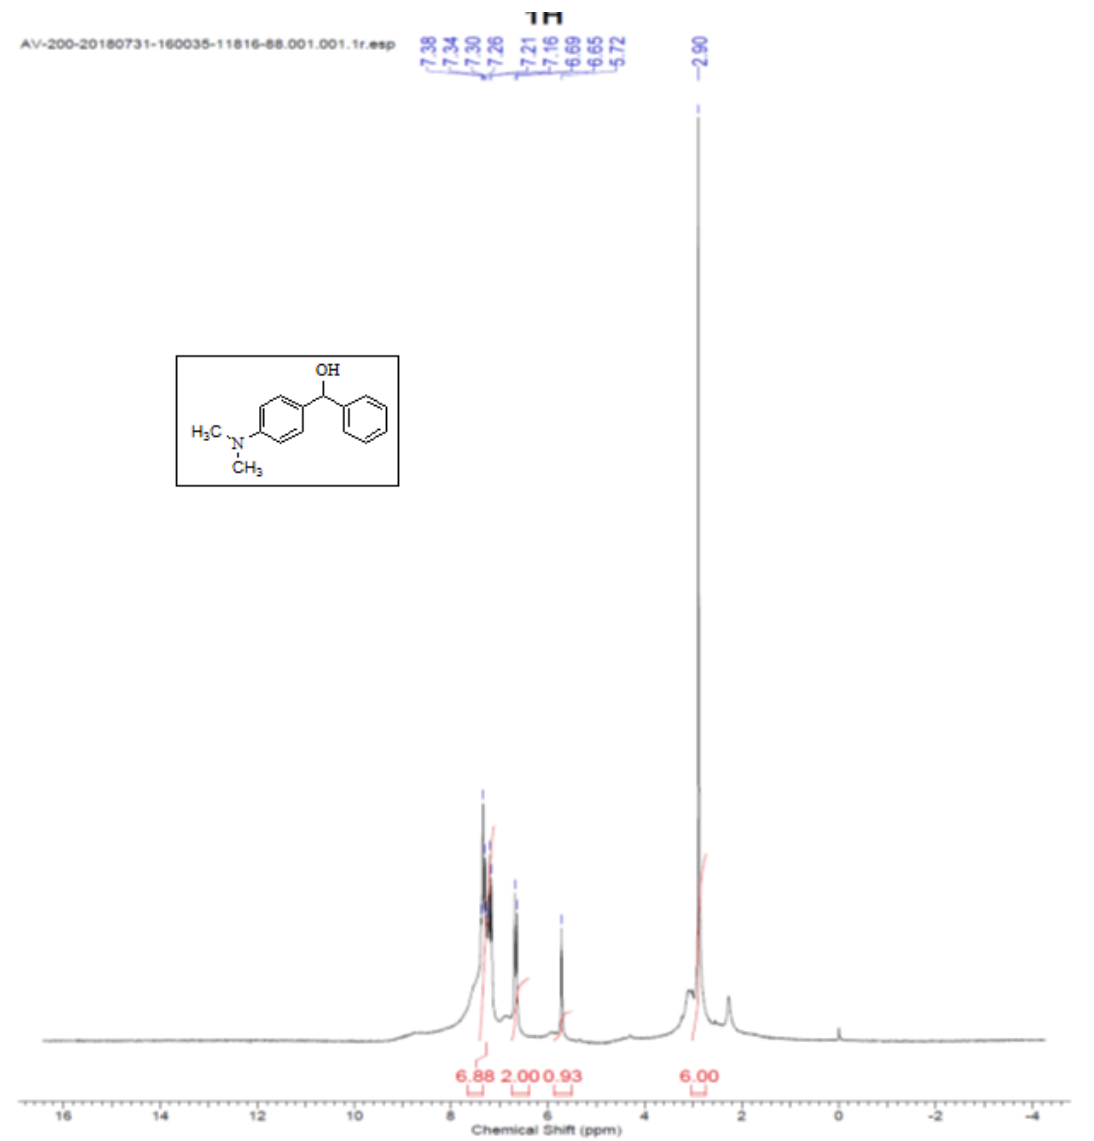

<sup>1</sup>H-NMR spectrum of (4-(dimethylamino)phenyl)(phenyl)methanol (**6**)

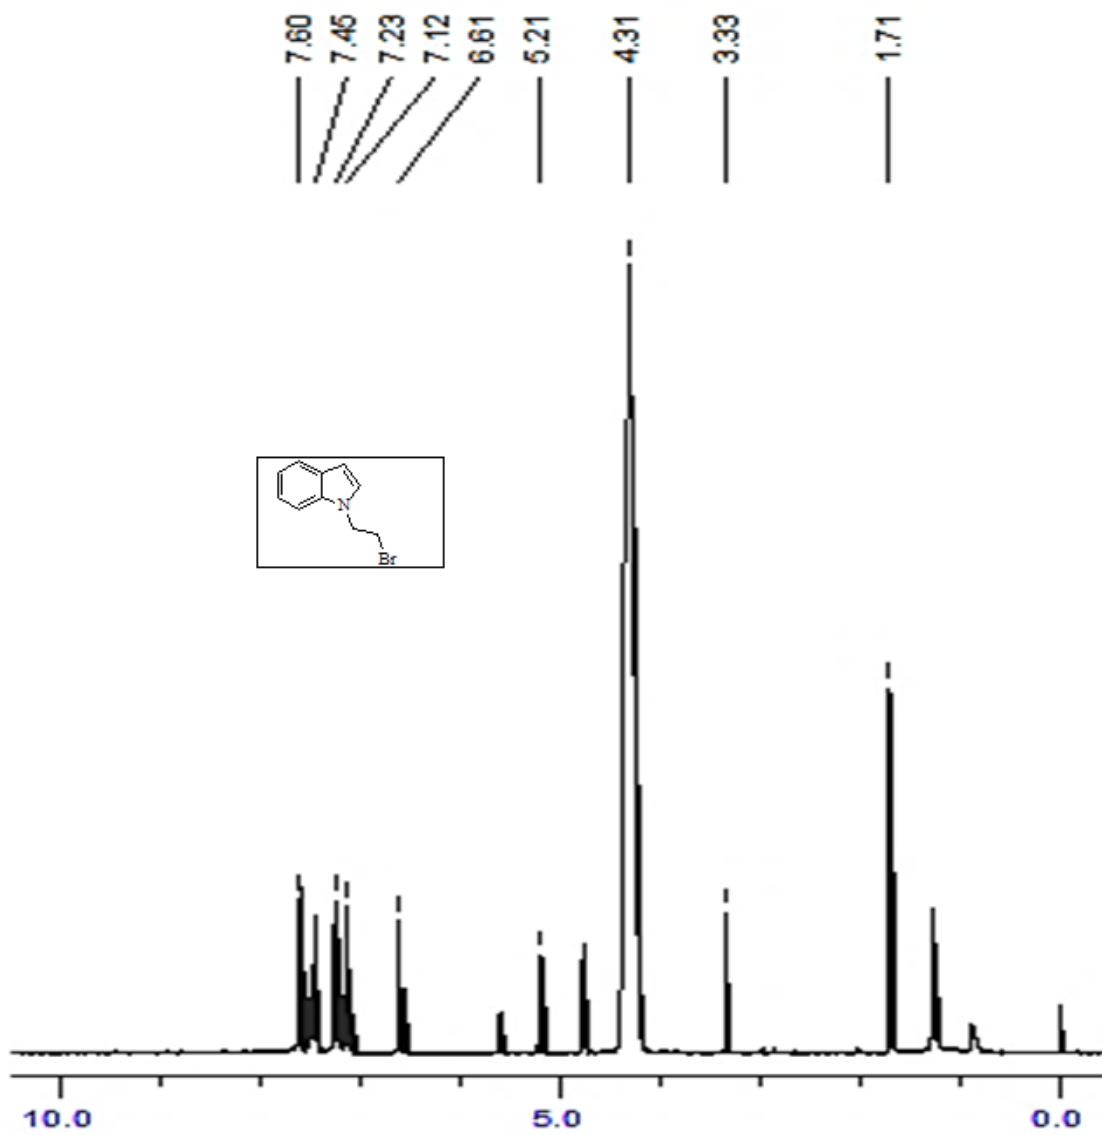

<sup>1</sup>H-NMR spectrum of 1-(2-bromoethyl)-1H-indole (6)

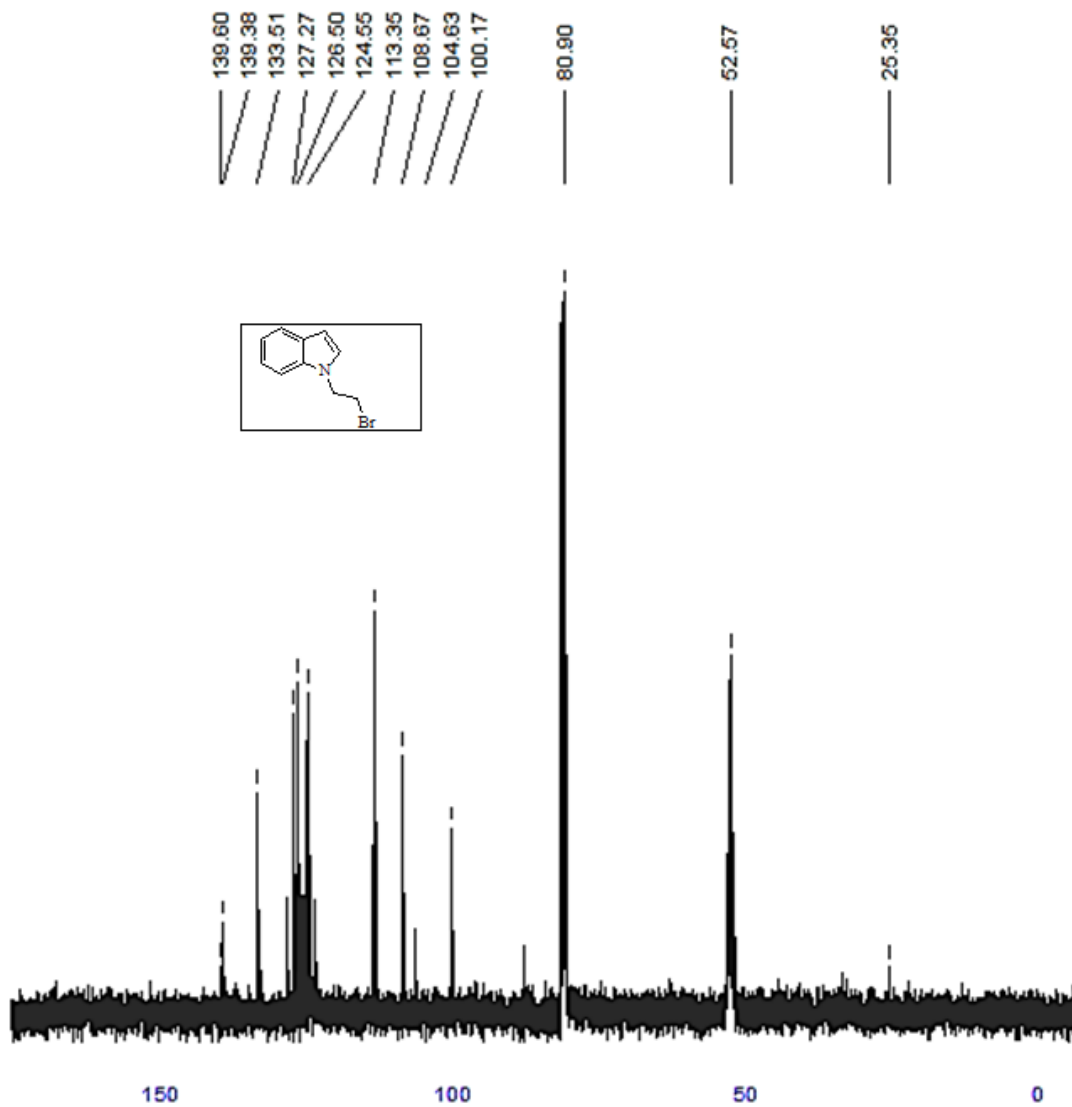

$^{13}\text{C}$ -NMR spectrum of 1-(2-bromoethyl)-1H-indole (6)



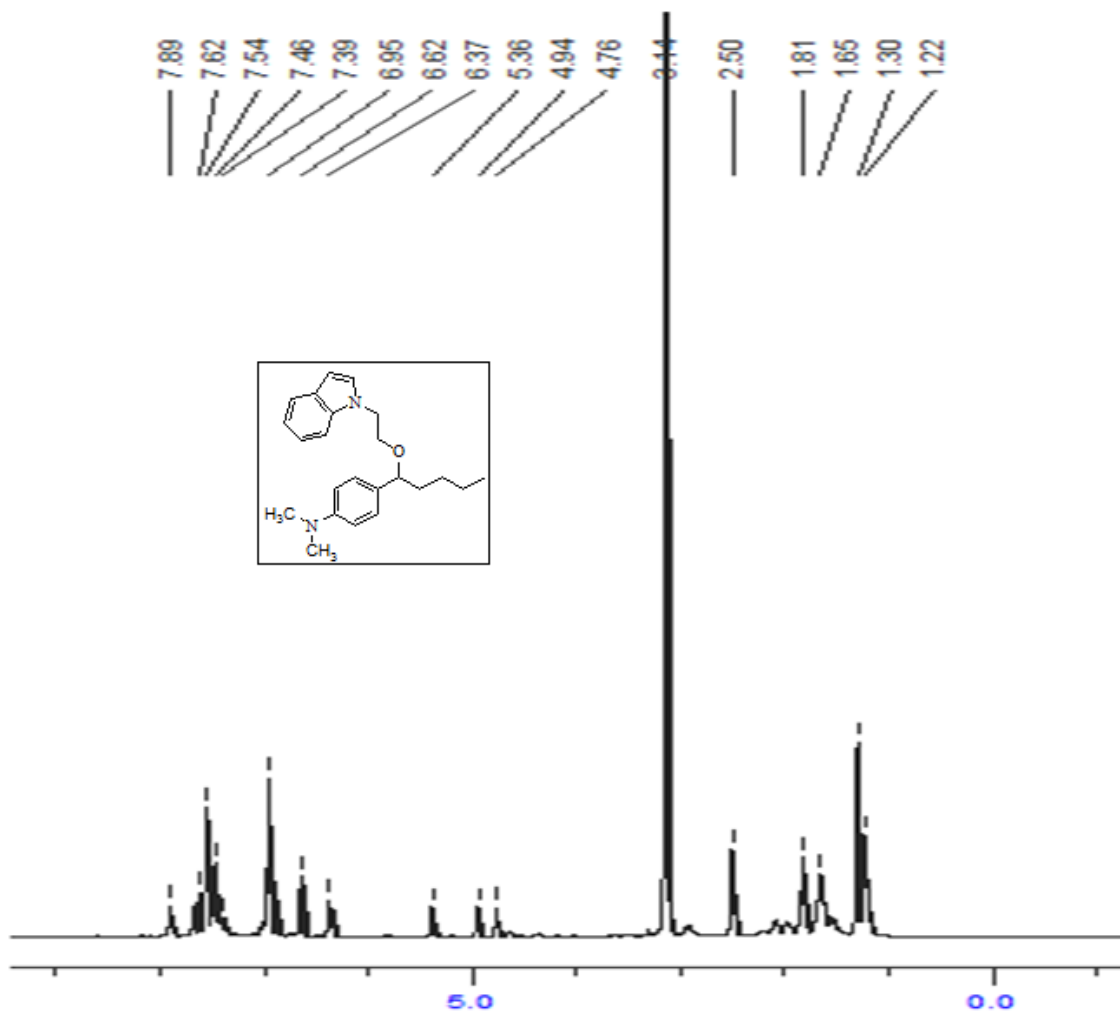

<sup>1</sup>H-NMR spectrum of 4-(1-(2-(1H-indol-1-yl) ethoxy) pentyl)-N, N-dimethyl aniline (**1**)

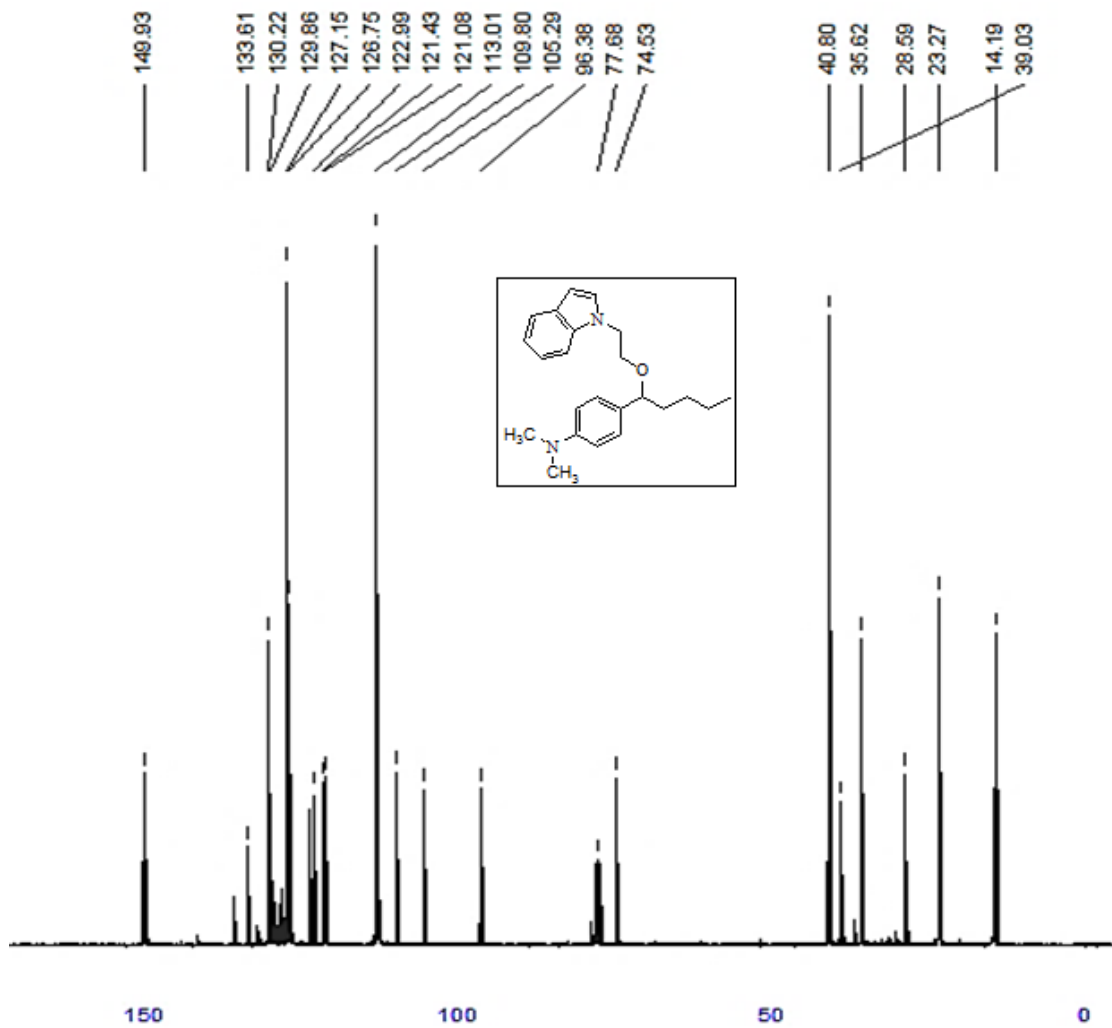

$^{13}\text{C}$ -NMR spectrum of 4-(1-(2-(1H-indol-1-yl) ethoxy) pentyl)-N, N-dimethyl aniline (**1**)

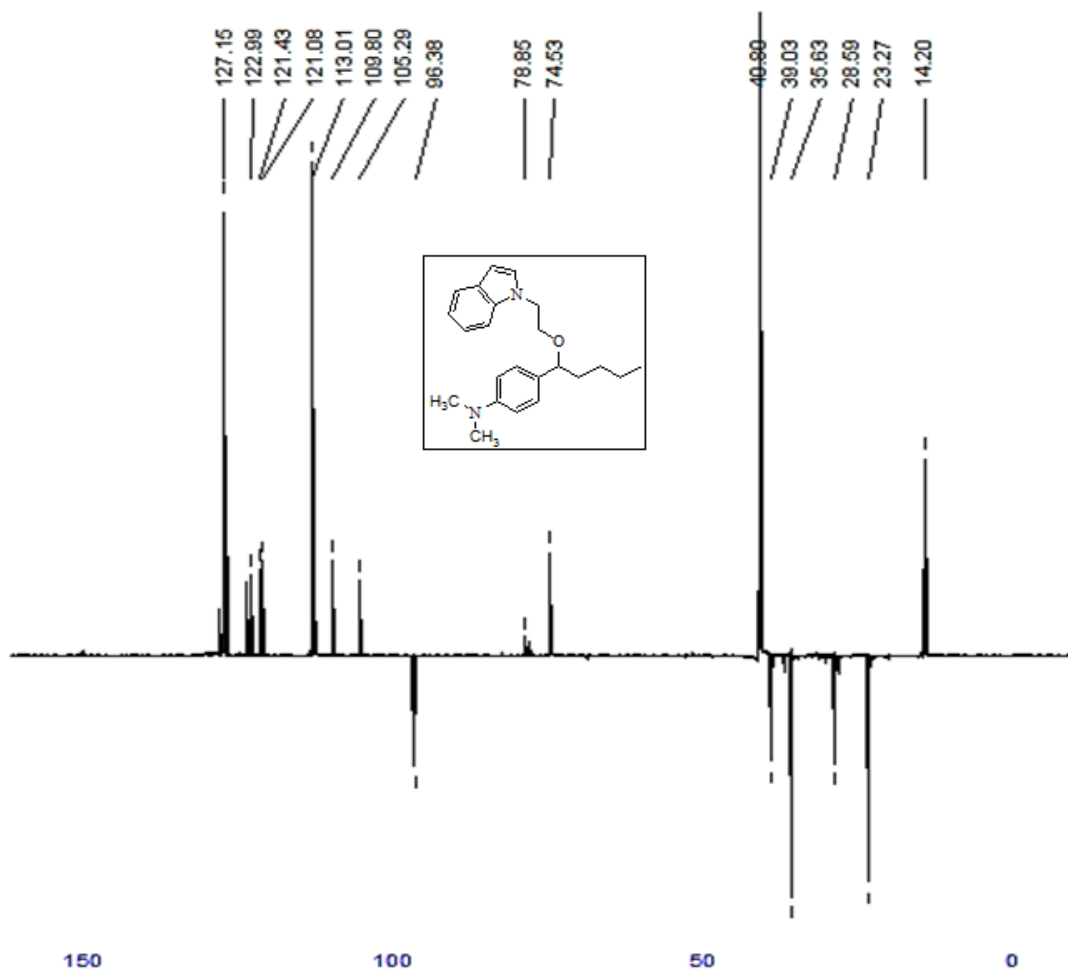

DEPT-135 spectrum of 4-(1-(2-(1H-indol-1-yl) ethoxy) pentyl)-N, N-dimethyl aniline (**1**)

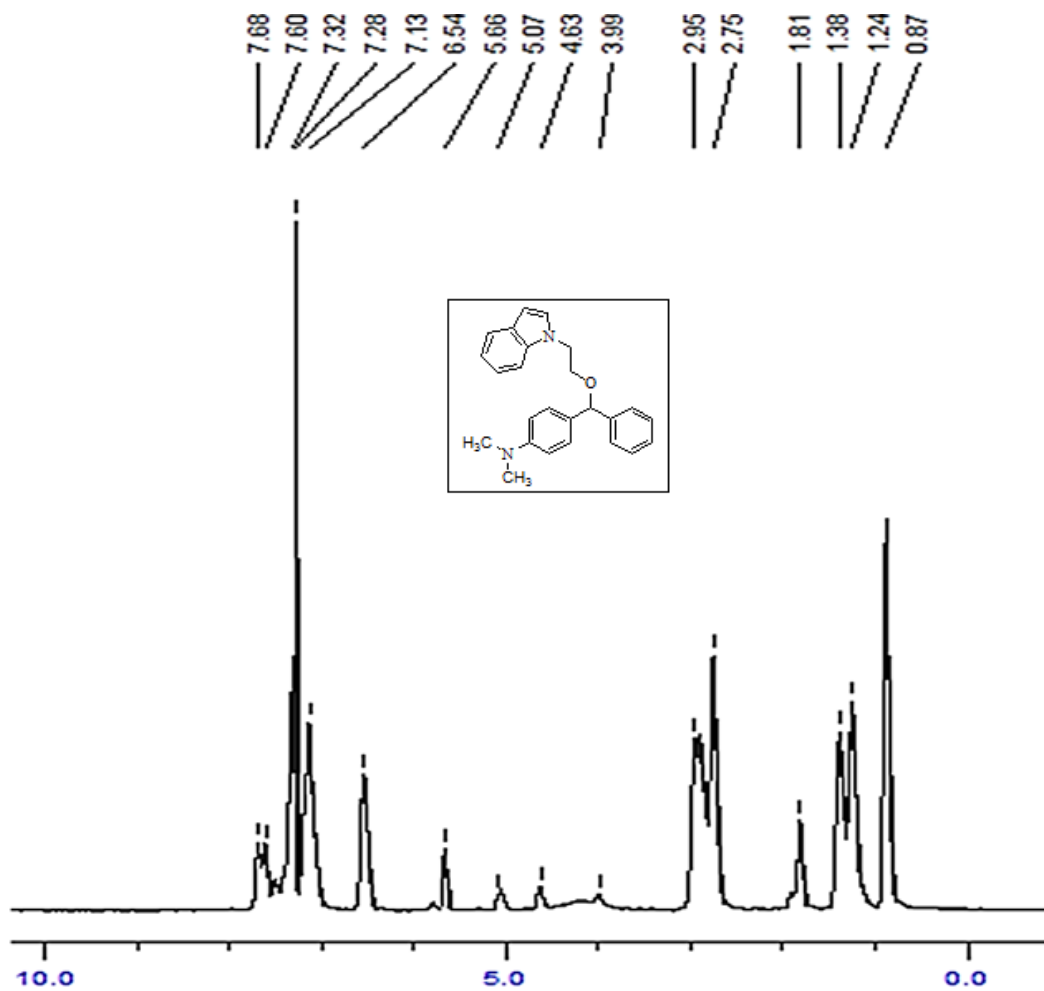

<sup>1</sup>H-NMR spectrum of 4-((2-(1H-indol-1-yl) ethoxy) (phenyl) methyl)-N, N-dimethyl aniline (**3**)

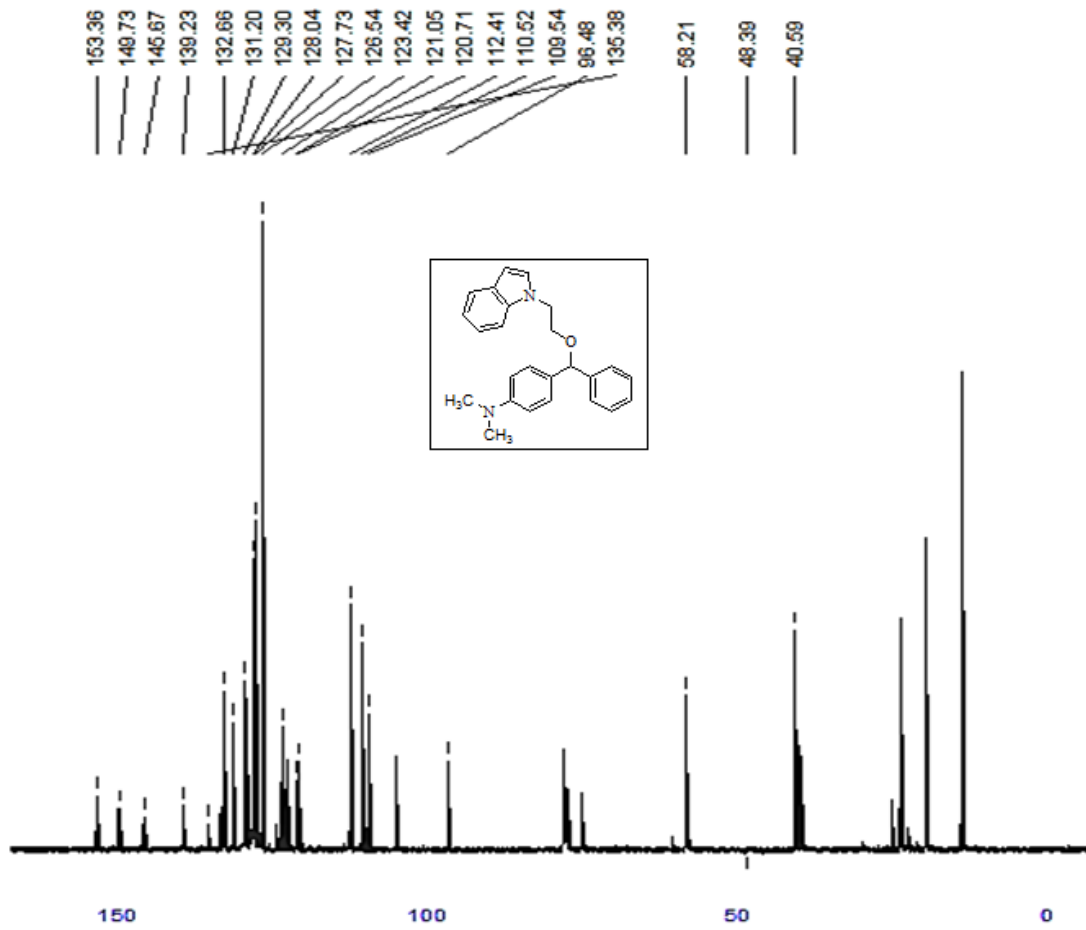

$^{13}\text{C}$ -NMR spectrum of 4-((2-(1H-indol-1-yl) ethoxy) (phenyl) methyl)-N, N-dimethyl aniline (**3**)
